# Supplementary material
Source: PubMed Central journal article supplement (PMC4277228)
Supplement: supp_tpc.114.132092_tpc132092_Supplemental.pdf [file supp_tpc.114.132092_tpc132092_Supplemental.pdf]

# Supplemental Figure 1

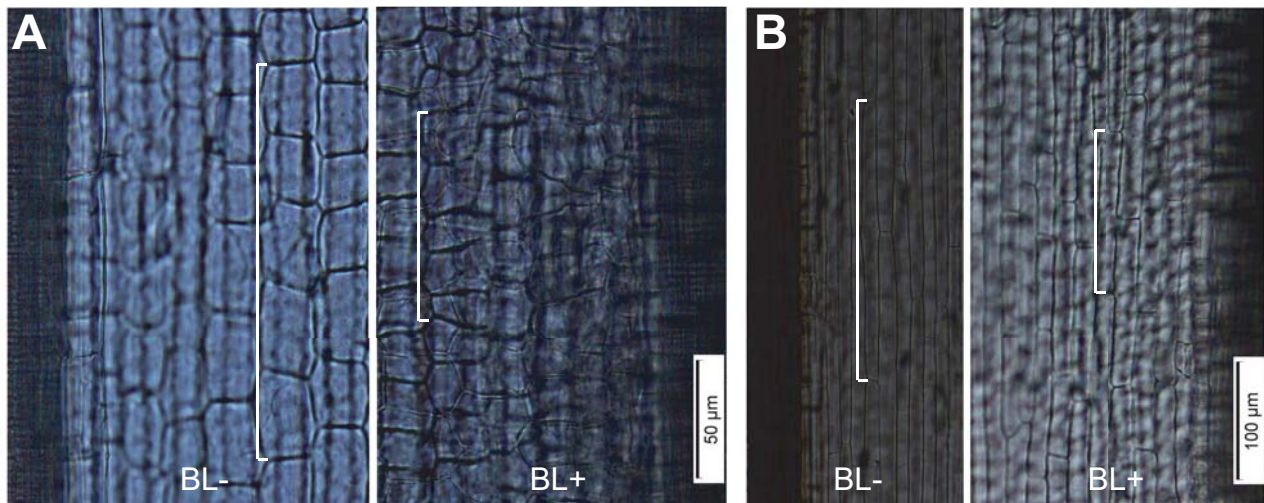

Supplemental Figure 1. Exogenous BR inhibits cell elongation in the leaf sheath. Longitudinally hand-cut slices of the second leaf sheath were used for microscopy observation.

(A) Mesophyll cell. Five cells were bracketed for comparison.

(B) Epidermal cell. One cell was bracketed for comparison.

# Supplemental Figure 2

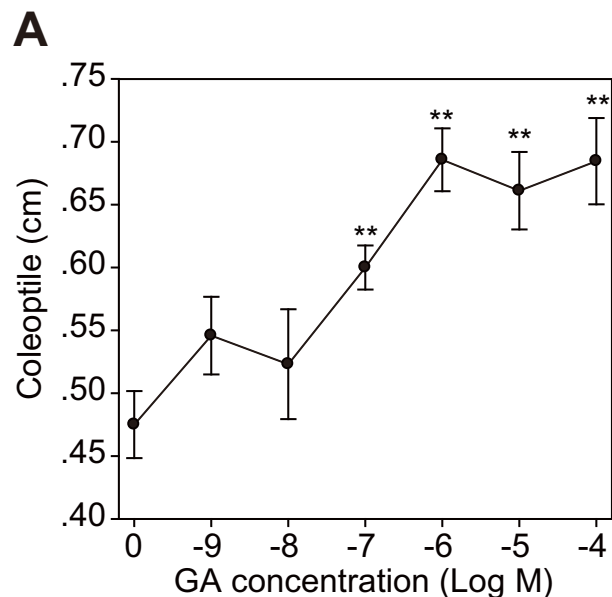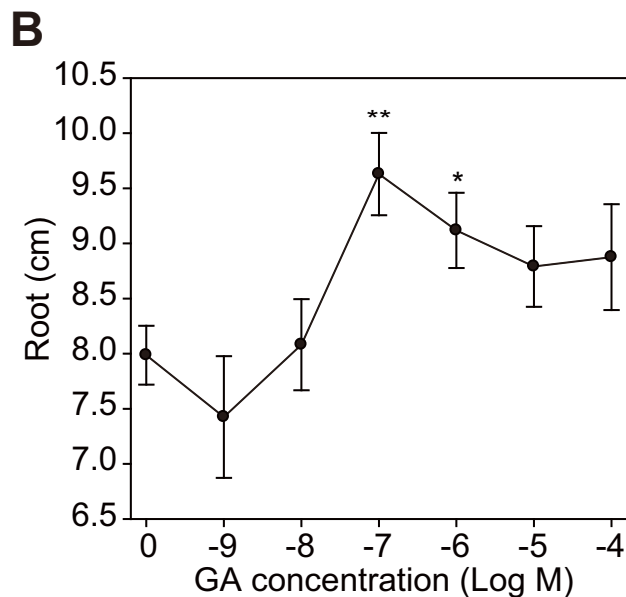

Supplemental Figure 2. GA affects wild-type plant growth.

(A) Coleoptile elongation in response to GA.

(B) Root response to GA.

Bars indicate SD (n=15). \* and \*\* indicate  $P < 0.05$  and  $P < 0.01$ , respectively in Student's *t*-test analysis.

# Supplemental Figure 3

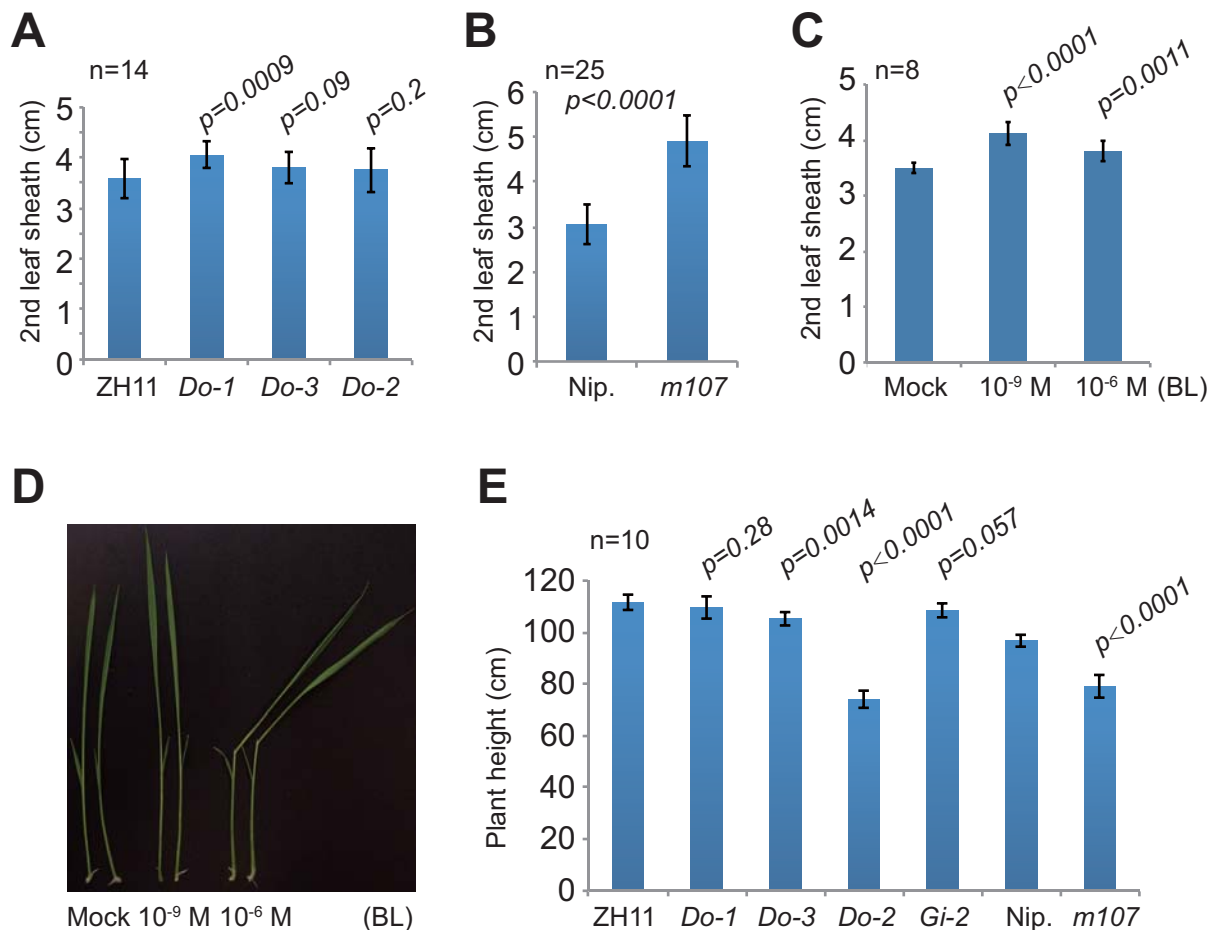

Supplemental Figure 3. Comparison of plant height of BR-related plants. The second leaf sheath length of enhanced BR-signaling plants (A), BR-accumulated plants (B), and short-term (two-day) BL-treated plants (C and D) at the seedling stage or plant height at the reproductive stage (E). P values were calculated using Student's *t*-test compared to their respective wild types or control. Bars indicate SD. Sample size was indicated on each panel.

# Supplemental Figure 4

## A

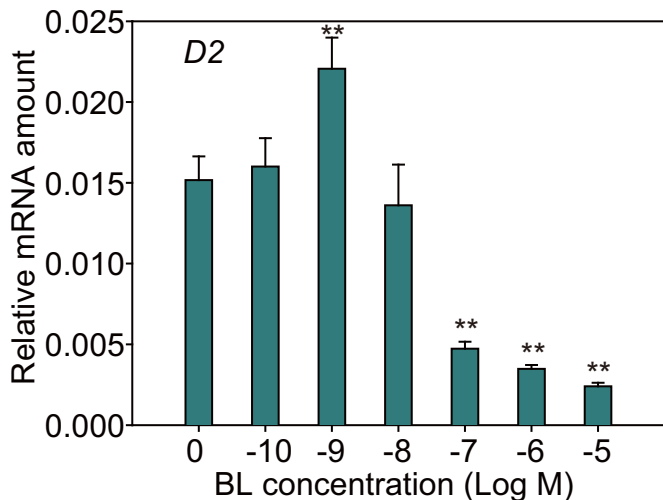

## B

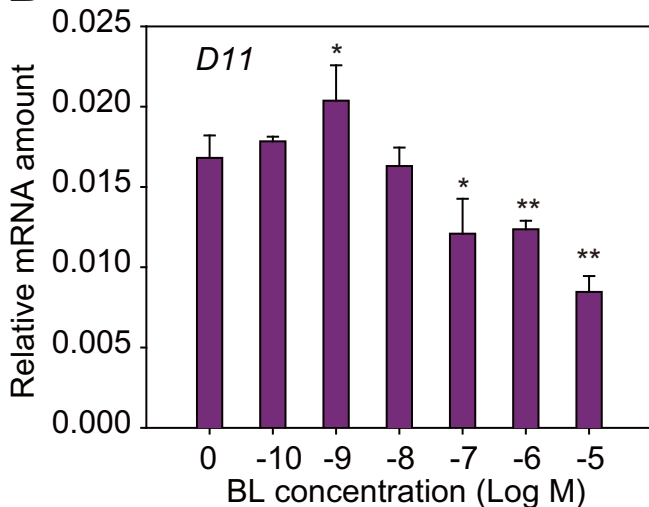

Supplemental Figure 4. Expression of *D2* and *D11* in response to various BR concentrations in shoot. \* $P < 0.05$  and \*\* $P < 0.01$  in *t*-test analysis. Bars indicate SD ( $n=3$ ).

# Supplemental Figure 5

**A**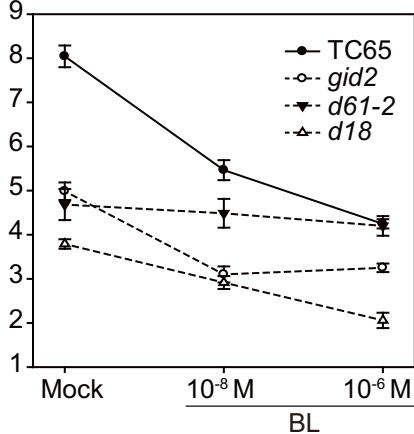**B**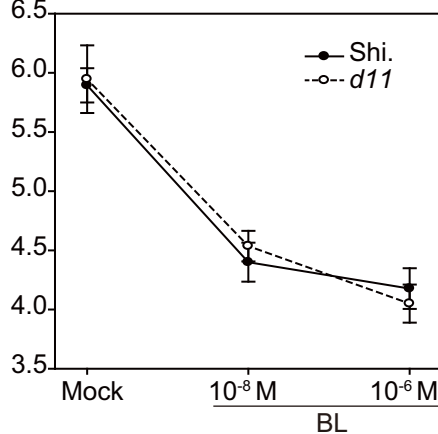**C**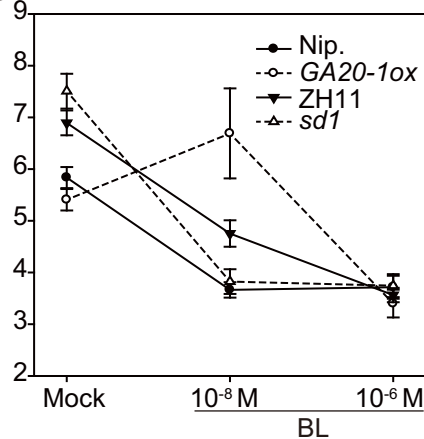**D**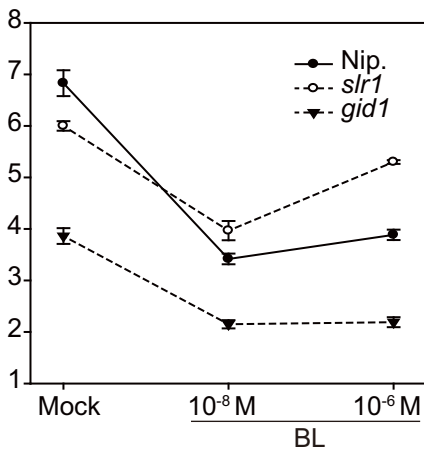**E**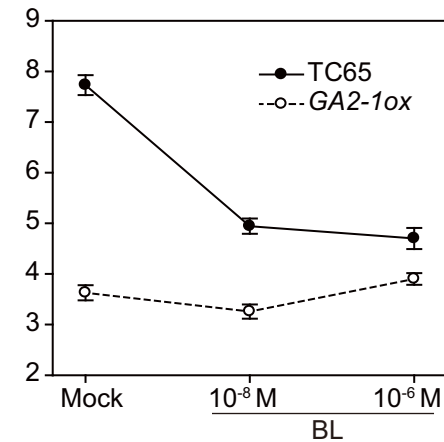

Supplemental Figure 5. Root response to BR in GA related mutant plants.

Plants were grouped by different backgrounds or independent experiments. Bars indicate SD (n=8 for *gid2*, *slr1*, and *gid1*; n=15 for others).

# Supplemental Figure 6

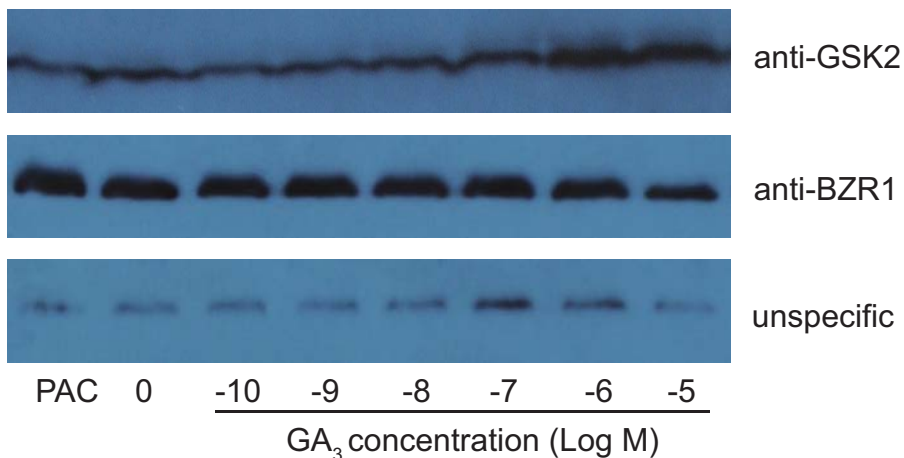

Supplemental Figure 6. The effect of GA and PAC application on GSK2 and BZR1 protein level. One-week-old seedlings were treated with  $10^{-5}$  M PAC or indicated concentrations of GA<sub>3</sub> and grew for two days. A unspecific band blotting with BZR1 antibody was used as internal reference.

# Supplemental Figure 7

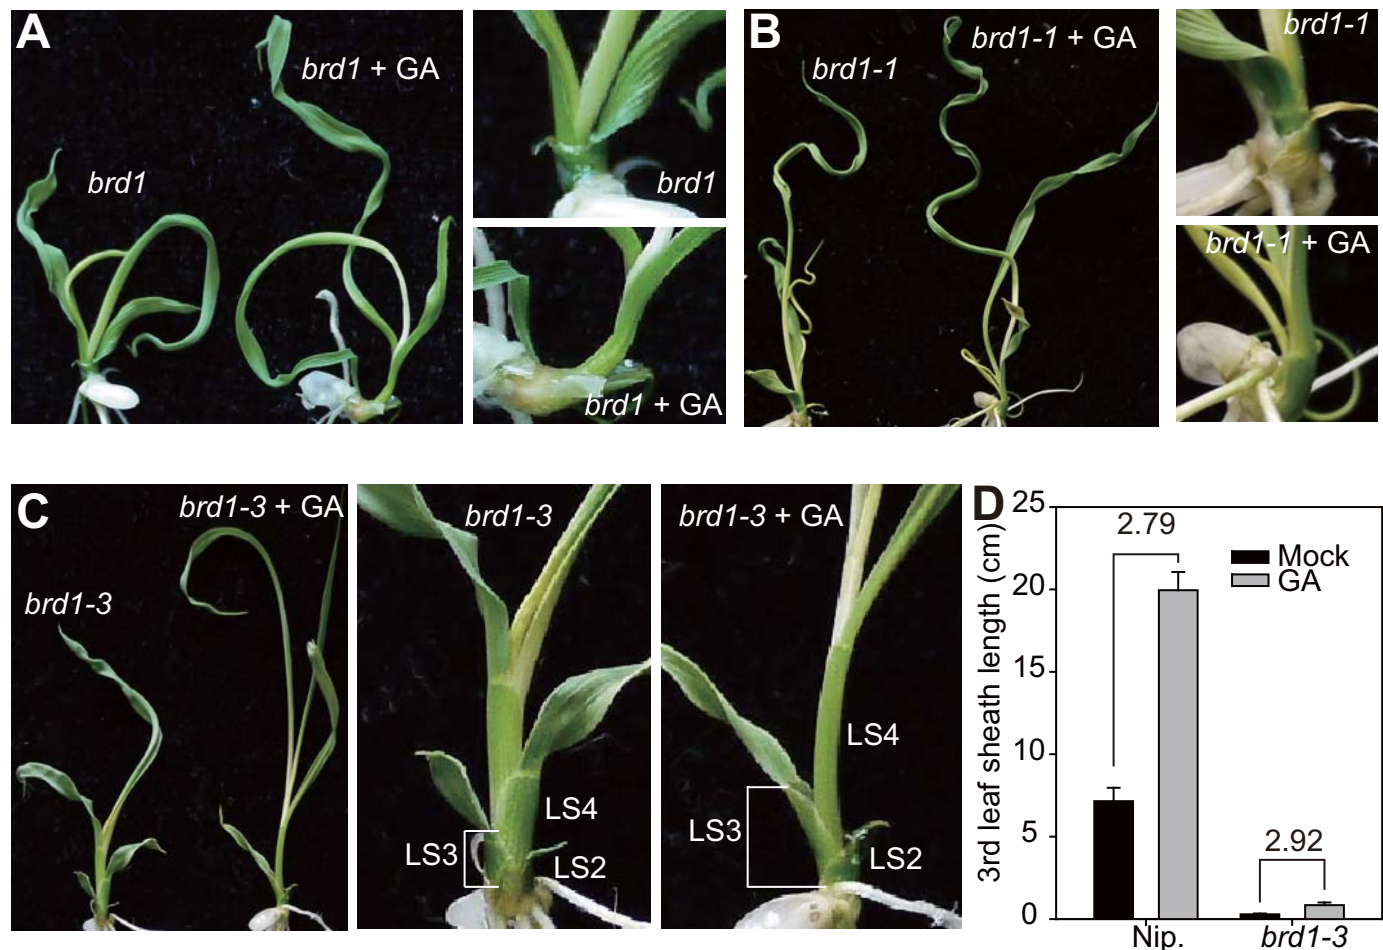

Supplemental Figure 7. Response of *brd1* alleles to GA treatment.

(A) and (B) Response of the most severe alleles (A, *brd1*, identified by Mori et al., 2002; B, *brd1-1*, identified by Hong et al., 2002) to GA treatment. The enlarged images in the right panel show no visible leaf sheath was developed in either of the mutants.

(C) and (D) Response of *brd1-3*, the relatively weak allele, to GA treatment. Both leaf sheath and leaf blade of *brd1-3* have obviously elongated in response to GA (C). Statistical data for the third leaf sheath were shown in (D). Bars indicate SD (n=5).



# Supplemental Figure 8

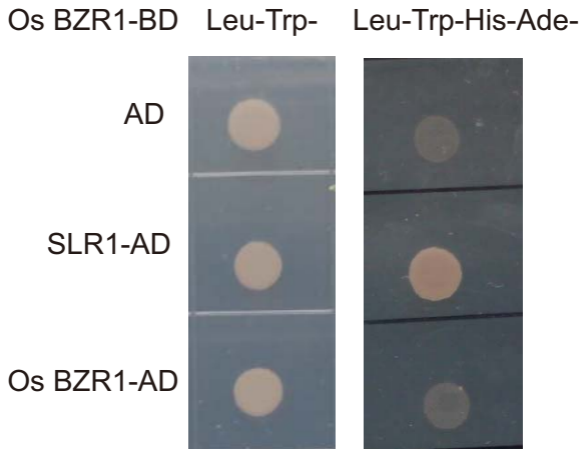

Supplemental Figure 8. SLR1 interacts with Os BZR1 in yeast.

Co-transformation of Os *BZR1-BD* and *SLR1-AD* can activate reporter gene expression in yeast two-hybrid analysis.

**Supplemental Table 1.** Information of the mutants and the transgenic plants used in this study. References were provided for the materials reported previously. Shi., Shiokari; Nip., Nipponbare; TC65, Taichang65; ZH11, Zhonghua11.

| <b>Classification</b> | <b>Name</b>                 | <b>Wild type</b> | <b>Information</b>                                                                        | <b>Reference</b>      |
|-----------------------|-----------------------------|------------------|-------------------------------------------------------------------------------------------|-----------------------|
| <b>BR-deficient</b>   | <i>d2-2</i>                 | Shi.             | <i>ebisu dwarf</i>                                                                        | Hong et al., 2003     |
|                       | <i>d11-2</i>                | Shi.             | <i>dwarf11</i>                                                                            | Tanabe et al., 2005   |
|                       | <i>brd1</i>                 | Nip.             | <i>brassinosteroid-deficient dwarf1</i> , strong allele                                   | Mori et al., 2002     |
|                       | <i>brd1-1</i>               | Nip.             | <i>brd1</i> strong allele                                                                 | Hong et al., 2002     |
|                       | <i>brd1-3</i>               | Nip.             | <i>brd1</i> relatively slightly weaker allele                                             | Hong et al., 2002     |
| <b>BR-accumulated</b> | <i>m107</i>                 | Nip.             | T-DNA insertion mutant with BR biosynthetic gene <i>D11</i> activated                     | Wan et al., 2009      |
| <b>Decreased</b>      | <i>d61-1</i>                | TC65             | <i>dwarf61</i> , <i>bri1</i> , weak allele                                                | Yamamuro et al., 2000 |
| <b>BR-signaling</b>   | <i>d61-2</i>                | TC65             | <i>d61</i> relatively strong allele                                                       | Yamamuro et al., 2000 |
|                       | <i>Go-2</i>                 | ZH11             | <i>GSK2</i> -overexpression plant                                                         | Tong et al., 2012     |
|                       | <i>dlt</i>                  | ZH11             | <i>dwarf</i> and <i>low-tillering</i>                                                     | Tong et al., 2009     |
| <b>Enhanced</b>       | <i>Gi-2</i>                 | ZH11             | <i>GSK2-RNAi</i> plant                                                                    | Tong et al., 2012     |
| <b>BR-signaling</b>   | <i>Do-1</i>                 | ZH11             | <i>DLT</i> -overexpression plant, weak line                                               | Tong et al., 2012     |
|                       | <i>Do-2</i>                 | ZH11             | <i>Do</i> relatively strong line                                                          | Tong et al., 2012     |
|                       | <i>Do-3</i>                 | ZH11             | <i>Do</i> mild line                                                                       | Tong et al., 2012     |
| <b>GA-deficient</b>   | <i>d18-Id18<sup>h</sup></i> | Shi.             | <i>dwarf18</i> with defective <i>GA3ox-2</i>                                              | Itoh et al., 2001     |
|                       | <i>d35</i>                  | Shi.             | <i>dwarf35</i> with defective <i>KO2</i> , <i>ko2-2</i>                                   | Itoh et al., 2004     |
|                       | <i>sd1</i>                  | ZH11             | <i>semi-dwarf1</i> with 7-bp deletion at 546-552 of <i>GA20ox-2</i>                       | Newly identified      |
|                       | <i>GA2-1ox</i>              | TC65             | <i>GA2ox-1</i> -overexpression plant                                                      | Newly developed       |
| <b>GA-accumulated</b> | <i>eui1-4</i>               | ZH11             | <i>elongated uppermost internode</i>                                                      | Luo et al., 2006      |
|                       | <i>GA20-1ox</i>             | Nip.             | <i>GA20ox-1</i> -overexpression plant                                                     | Newly developed       |
| <b>Decreased</b>      | <i>gid1</i>                 | Nip.             | <i>gibberellin insensitive dwarf1</i> with point mutation cDNA G(587) to T in <i>GID1</i> | Newly identified      |
| <b>GA-signaling</b>   | <i>gid2</i>                 | TC65             | <i>gibberellin insensitive dwarf2</i>                                                     | Sasaki et al., 2003   |
| <b>Enhanced</b>       | <i>slr1</i>                 | Nip.             | <i>slender</i> with cDNA T(1101) deletion in <i>SLR1</i>                                  | Newly identified      |
| <b>GA-signaling</b>   |                             |                  |                                                                                           |                       |

**Supplemental Table 2.** Quantification of GA<sub>1</sub> in wild type and *Do* plants. Means ± SD of three replicates are shown (ng/g F.W.).

| Analyte     | GA <sub>1</sub> |
|-------------|-----------------|
| Wild type   | 0.30±0.02       |
| <i>Do-1</i> | 0.33±0.02       |
| <i>Do-3</i> | 0.32±0.02       |
| <i>Do-2</i> | 0.31±0.01       |

**Supplemental Table 3.** Quantification of GAs in wild type, *m107*, and short-term BL-treated plants. Wild-type plants were treated with 10<sup>-6</sup> M BL for two days. Means ± SD of three replicates are shown (ng/g F.W.).

| Analyte     | GA1       | GA8       | GA19       | GA20      | GA29      | GA44      | GA53      |
|-------------|-----------|-----------|------------|-----------|-----------|-----------|-----------|
| Wild type   | 1.26±0.06 | 0.44±0.03 | 11.65±0.18 | 0.83±0.06 | 0.16±0.03 | 0.60±0.17 | 0.74±0.01 |
| <i>m107</i> | 7.20±0.18 | 3.14±0.19 | 5.97±0.19  | 0.19±0.03 | 0.07±0.01 | 0.58±0.19 | 0.75±0.01 |
| BL          | 2.88±0.13 | 1.39±0.13 | 4.93±0.25  | 0.17±0.03 | 0.09±0.01 | 0.27±0.05 | 0.53±0.02 |

**Supplemental Table 4.** Quantification of CS in wild type and *m107*. Means ± SD of three replicates are shown (ng/g F.W.).

| Analyte     | CS        |
|-------------|-----------|
| Wild type   | 0.34±0.01 |
| <i>m107</i> | 0.94±0.04 |

**Supplemental Table 5.** Quantification of GAs in wild type and long-term BL-treated plants. Means ± SD of three replicates are shown (ng/g F.W.).

| Analyte               | GA1       | GA8       | GA19       | GA20      | GA29      | GA44      | GA53      |
|-----------------------|-----------|-----------|------------|-----------|-----------|-----------|-----------|
| Mock                  | 0.30±0.02 | 0.47±0.02 | 15.41±1.80 | 1.06±0.06 | 0.24±0.03 | 5.43±0.21 | 2.34±0.17 |
| 10 <sup>-6</sup> M BL | 0.14±0.01 | 0.16±0.00 | 8.62±0.75  | 0.47±0.05 | 0.14±0.04 | 3.29±0.27 | 1.34±0.05 |
| 10 <sup>-5</sup> M BL | 0.12±0.01 | 0.20±0.02 | 8.51±0.67  | 0.57±0.03 | 0.17±0.01 | 2.04±0.19 | 1.39±0.03 |

**Supplemental Table 6.** Primers used for qRT-PCR and ChIP-qPCR analysis.

| Name                         | Forward (5'-3')                    | Reverse (5'-3')                      |
|------------------------------|------------------------------------|--------------------------------------|
| <b>For qRT-PCR:</b>          |                                    |                                      |
| <i>GA20ox-1</i>              | GCCACTACAGGGCCGACAT                | TGGTTGCAGGTGACGATGAT                 |
| <i>GA20ox-2</i>              | CCAATTTTGGACCCTACCGC               | GAGAGAAGCCCAACCCAACC                 |
| <i>GA3ox-2</i>               | TCCTCCTTCTTCTCCAAGCTCAT            | GAAACTCCTCCATCACGTCACA               |
| <i>GA2ox-1</i>               | TGACGATGATGACAGCGACAA              | CCATAGGCATCGTCTGCAATT                |
| <i>GA2ox-3</i>               | TGGTGGCCAACAGCCTAAAG               | TGGTGCAATCCTCTGTGCTAAC               |
| <i>D2</i>                    | AGCTGCCTGGCACTAGGCTCTACAGATCA<br>C | ATGTTGTCTGGAGATGAGCTCGTTCGGTGAG<br>C |
| <i>D11</i>                   | TTGGGTCATGGCATGGCAAGAGCAAGGA       | TTGTTGCTGGAGCCAGCATTCCCTCCTCT        |
| <i>ACTIN1</i>                | TGCTATGTACGTCGCCATCCAG             | AATGAGTAACCACGCTCCGTCA               |
| <b>For ChIP-qPCR:</b>        |                                    |                                      |
| <i>D2 P1</i>                 | TCTCCTCAATCTCCCCTCTTT              | CGAGTTCTAACCCACTTCGTG                |
| <i>D2 P2</i>                 | TAGGGACGAGTATGCGAACG               | ACCGGTCACCACCACCATAC                 |
| <i>D2 P3</i>                 | CGTCTCTACTCCCCACTTG                | GAGGAGAGCAGAGCAGAGGA                 |
| <i>GA20ox-2 P1</i>           | CGTATACCATGCGGTTATCG               | CGTTTTAGGTGGGGTTACCA                 |
| <i>GA20ox-2 P2</i>           | CATGTGCCTGTATGGTGCAT               | TGACAGGGAAATGGTTCCTC                 |
| <i>GA20ox-2 P3</i>           | AAAAGGAAGAGCTCGCTGTG               | CGTGGAAAACCTAACCTCTGG                |
| <i>GA20ox-2 P4</i>           | CAAGAAAGCCCGAGTCAATC               | GTGCATTTCTTCCGGTGAAT                 |
| <i>GA3ox-2 P1</i>            | CCAATGCATCCTCTCTCTC                | CATCATCATCCATCCATCCA                 |
| <i>GA3ox-2 P2</i>            | CGAATGAAATTCGACGTGTATG             | AACAGTAGCGTCCTCCGTTG                 |
| <i>GA3ox-2 P3</i>            | CCTCTCCCTTGTACTTGTCCAG             | TGGCAGAAAGCCAGTAACAA                 |
| <i>GA2ox-3 P1</i>            | ATACGTTGCGCGATCTCATC               | CAGTAGCTCACACGCACGAT                 |
| <i>GA2ox-3 P2</i>            | CTTGATTACTATTTTCTCCATCGAA          | GCATGAGTAATTAGCAATAGAATGGA           |
| <i>GA2ox-3 P3</i>            | CCCGTACCATACTCGACCAA               | CATGGCTGCATAGGTGCATA                 |
| <i>GA2ox-3</i><br>(3'-UTR)   | TGGTGGCCAACAGCCTAAAG               | TGGTGCAATCCTCTGTGCTAAC               |
| <i>DLT</i><br>(codon region) | CCTGGCGTTCGAGTTCCA                 | TGGCGAGGACGCAGTTCA                   |
| <i>ACTIN1</i><br>(intron)    | TGGCATCTCTCAGCACATTC               | GGCAAGCAACATTGTAAGCA                 |

## Supplemental References

Hong, Z., Ueguchi-Tanaka, M., Shimizu-Sato, S., Inukai, Y., Fujioka, S., Shimada, Y., Takatsuto, S., Agetsuma, M., Yoshida, S., Watanabe, Y., Uozu, S., Kitano, H., Ashikari, M., and Matsuoka, M. (2002). Loss-of-function of a rice brassinosteroid biosynthetic enzyme, C-6 oxidase, prevents the organized arrangement and polar elongation of cells in the leaves and stem. *Plant J* **32**, 495-508.

Itoh, H., Ueguchi-Tanaka, M., Sentoku, N., Kitano, H., Matsuoka, M., and Kobayashi, M. (2001). Cloning and functional analysis of two gibberellin 3 beta-hydroxylase genes that are differently expressed during the growth of rice. *Proc Natl Acad Sci USA* **98**, 8909-8914.

Itoh, H., Tatsumi, T., Sakamoto, T., Otomo, K., Toyomasu, T., Kitano, H., Ashikari, M., Ichihara, S., and Matsuoka, M. (2004). A rice semi-dwarf gene, *Tan-Ginbozu (D35)*, encodes the gibberellin biosynthesis enzyme, ent-kaurene oxidase. *Plant Mol. Biol.* **54**, 533-547.

Luo, A., Qian, Q., Yin, H., Liu, X., Yin, C., Lan, Y., Tang, J., Tang, Z., Cao, S., Wang, X., Xia, K., Fu, X., Luo, D., and Chu, C. (2006). *EUI1*, encoding a putative cytochrome P450 monooxygenase, regulates internode elongation by modulating gibberellin responses in rice. *Plant Cell Physiol* **47**, 181-191.

Mori, M., Nomura, T., Ooka, H., Ishizaka, M., Yokota, T., Sugimoto, K., Okabe, K., Kajiwara, H., Satoh, K., Yamamoto, K., Hirochika, H., and Kikuchi, S. (2002). Isolation and characterization of a rice dwarf mutant with a defect in brassinosteroid biosynthesis. *Plant Physiol* **130**, 1152-1161.

Sasaki, A., Itoh, H., Gomi, K., Ueguchi-Tanaka, M., Ishiyama, K., Kobayashi, M., Jeong, D.H., An, G., Kitano, H., Ashikari, M., and Matsuoka, M. (2003). Accumulation of phosphorylated repressor for gibberellin signaling in an F-box mutant. *Science* **299**, 1896-1898.

Tanabe, S., Ashikari, M., Fujioka, S., Takatsuto, S., Yoshida, S., Yano, M., Yoshimura, A., Kitano, H., Matsuoka, M., Fujisawa, Y., Kato, H., and Iwasaki, Y. (2005). A novel cytochrome P450 is implicated in brassinosteroid biosynthesis via the characterization of a rice dwarf mutant, *dwarf11*, with reduced seed length. *Plant Cell* **17**, 776-790.

Tong, H., Liu, L., Jin, Y., Du, L., Yin, Y., Qian, Q., Zhu, L., and Chu, C. (2012). DWARF AND

LOW-TILLERING acts as a direct downstream target of a GSK3/SHAGGY-like kinase to mediate brassinosteroid responses in rice. *Plant Cell* **24**, 2562-2577.

**Tong, H., Jin, Y., Liu, W., Li, F., Fang, J., Yin, Y., Qian, Q., Zhu, L., and Chu, C.** (2009). DWARF AND LOW-TILLERING, a new member of the GRAS family, plays positive roles in brassinosteroid signaling in rice. *Plant J* **58**, 803-816.

**Wan, S., Wu, J., Zhang, Z., Sun, X., Lv, Y., Gao, C., Ning, Y., Ma, J., Guo, Y., Zhang, Q., Zheng, X., Zhang, C., Ma, Z., and Lu, T.** (2009). Activation tagging, an efficient tool for functional analysis of the rice genome. *Plant Mol Biol* **69**, 69-80.

**Yamamuro, C., Ihara, Y., Wu, X., Noguchi, T., Fujioka, S., Takatsuto, S., Ashikari, M., Kitano, H., and Matsuoka, M.** (2000). Loss of function of a rice *brassinosteroid insensitive1* homolog prevents internode elongation and bending of the lamina joint. *Plant Cell* **12**, 1591-1606.
